# Supplementary material for: Impact of 2018 ESC/ESH and 2017 ACC/AHA Hypertension Guidelines: Difference in Prevalence of White-Coat and Masked Hypertension
Source: MDPI journal article supplement (doi:10.3390/healthcare8020122), 2020-05-03
Supplement: s1 [file s1]

# Impact of 2018 ESC/ESH and 2017 ACC/AHA Hypertension Guidelines: Difference in Prevalence of White-Coat and Masked Hypertension

Byong-Kyu Kim <sup>1</sup> and Moo-Yong Rhee <sup>2,\*</sup>

<sup>1</sup> Division of Cardiology, Department of Internal Medicine, Dongguk University College of Medicine, Gyeongju Hospital, Gyeongju 38067, Korea; bleumatin@dongguk.ac.kr

<sup>2</sup> Cardiovascular Center, Dongguk University Ilsan Hospital, 27 Dongguk-ro, Ilsandong-gu, Goyang-si, Gyeonggi 10326, Korea

\* Correspondence: mooyong.rhee@dumc.or.kr; Tel.: +82-31-961-5775; Fax: +82-31-961-7786

Received: 3 April 2020; Accepted: 30 April 2020; Published: 3 May 2020

**Abstract:** Our study evaluated whether there were differences in the prevalence of white-coat hypertension (WH) and masked hypertension (MH) based on the 2018 ESC/ESH and 2017 ACC/AHA hypertension guidelines in Korea. The motivation was the lowering of the diagnostic threshold for hypertension in the 2017 ACC/AHA guidelines. Of 319 participants without antihypertensive drug history and with suspected hypertension based on outpatient clinic blood pressure (BP) measured by physicians, 263 participants (51.6 ± 9.6 years; 125 men) who had valid research-grade office BP and 24-h ambulatory BP measurements were enrolled. WH prevalence based on daytime ambulatory BP among normotensive individuals was lower with the ESC/ESH guidelines than the ACC/AHA guidelines (29.0% vs. 71.4%,  $p < 0.001$ ). However, MH prevalence based on daytime ambulatory BP among hypertensive individuals was higher based on the ESC/ESH guidelines (21.6% vs. 1.8%,  $p < 0.001$ ). Seventy percent of WH cases (2017 ACC/AHA guidelines) and 95.2% of MH cases (2018 ESC/ESH guidelines) occurred in individuals with systolic BP of 130–139 mmHg and/or diastolic BP of 80–89 mmHg. The diagnostic threshold of the 2017 ACC/AHA guidelines yielded a higher prevalence of WH compared to that of the 2018 ESC/ESH guidelines. However, the prevalence of MH was higher with the 2018 ESC/ESH guidelines than with the 2017 ACC/AHA guidelines. The high prevalence of WH and MH in people with a systolic BP of 130–139 mmHg or diastolic BP of 80–89 mmHg suggests the need for a more active out-of-office BP measurement in this patient group.

**Keywords:** hypertension; guidelines; white coat hypertension; masked hypertension; ambulatory blood pressure

**Supplemental tables 1–3.** They were cited in the result section of the main text, consecutively.

**Table S1.** Degree of agreement for the diagnosis of hypertension by office measured blood pressure according to 2018 ESC/ESH and 2017 ACC/AHA hypertension guidelines. Referenced to 24-h ambulatory blood pressure.

|                         | Sensitivity         | Specificity         | PPV                 | NPV                 | Kappa |
|-------------------------|---------------------|---------------------|---------------------|---------------------|-------|
| 2018 ESC/ESH guidelines | 75.0<br>(69.6–81.5) | 78.4<br>(64.7–88.7) | 93.6<br>(89.6–96.1) | 44.0<br>(37.2–50.9) | 0.419 |
| 2017 ACC/AHA guidelines | 95.9<br>(92.6–98.0) | 33.3<br>(13.3–59.0) | 95.2<br>(93.4–96.5) | 37.3<br>(19.6–59.2) | 0.308 |

PPV = positive predictive value; NPV = negative predictive value; Ref = reference; BP = blood pressure; ESC/ESH = European Society of Cardiology/European Society of Hypertension; ACC/AHA = American College of Cardiology/American Heart Association.

**Table S2.** Prevalence of white coat hypertension and masked hypertension based on a diagnostic threshold of the 2018 ESC/ESH and 2017 ACC/AHA hypertension guidelines. Referenced to 24 h ambulatory blood pressure.

|                             | Normotensives         |                                     | Hypertensive                    |                                    |
|-----------------------------|-----------------------|-------------------------------------|---------------------------------|------------------------------------|
|                             | Normotension<br>n (%) | White-coat<br>hypertension<br>n (%) | Masked<br>hypertension<br>n (%) | Sustained<br>hypertension<br>n (%) |
| 2018 ESC/ESH<br>criteria    | 40 (78.4)             | 11 (21.6)                           | 51 (24.1)                       | 161 (75.9)                         |
| 2017<br>ACC/AHA<br>criteria | 6 (33.3)              | 12 (66.7)                           | 10 (4.1)                        | 235 (95.9)                         |
| <i>p</i> value *            | 0.005                 | 0.005                               | <0.001                          | <0.001                             |

Normotensives and hypertensives were diagnosed based on 24-h ambulatory blood pressure.\* *p*-value from Z-test of the difference between the rate of each phenotype of hypertension according to the criteria of the ESC/ESH and ACC/AHA hypertension guidelines. ACC/AHA = American College of Cardiology/American Heart Association; ESC/ESH = European Society of Cardiology/European Society of Hypertension.

**Table S3.** Prevalence of hypertension phenotypes in participants with a systolic blood pressure of 130–139 mmHg and/or diastolic blood pressure of 80–89 mmHg. Referenced to 24 h ambulatory blood pressure.

|                             | Normotension<br>n (%) | White-Coat<br>Hypertension<br>n (%) | Masked<br>Hypertension<br>n (%) | Sustained<br>Hypertension<br>n (%) |
|-----------------------------|-----------------------|-------------------------------------|---------------------------------|------------------------------------|
| 2018<br>ESC/ESH<br>criteria | 27 (36.0)             |                                     | 48 (64.0)                       |                                    |
| 2017<br>ACC/AHA<br>criteria |                       | 8 (10.7)                            |                                 | 67 (89.3)                          |

ACC/AHA = American College of Cardiology/American Heart Association; ESC/ESH = European Society of Cardiology/European Society of Hypertension.

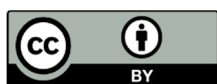

© 2020 by the authors. Submitted for possible open access publication under the terms and conditions of the Creative Commons Attribution (CC BY) license (<http://creativecommons.org/licenses/by/4.0/>).
